# Supplementary material
Source: MDPI journal article supplement (https://www.mdpi.com/1999-4907/10/10/893)
Supplement: s1 [file s1]

## Sheet: pool data
individual	hect	firewood	poles_yr	cattle	proc	edu	age	fam_size	dist	road	horse	tenure	slope	split	h_sc	h_pastur	TDF	Tot_pop	MI
1	16	52	60	22	1	6	51	4	1	0	1	35	2	0	15	0	0	3497	4.6829
2	22	104	100	0	1	1	53	5	1	0	1	37	2	0	4	12	0	985	6.12781
22	57	104	100	20	1	0	58	7	1.5		1	43	2	1	7	0	50	286	10.8763
23	60	52	50	20	0	5	66	5	1.5		1	46	1	0	5	9	50	286	10.8763
24	2	104	20	0	0	0	47	5	1	0	1	30	1	1	3	0	50	286	10.8763
25	72	104	300	6	1	0	71	3	0.1	1	1	60	2	0	12	0	50	286	10.8763
26	10	52	100	10	0	6	54	3	2	0	1	34	2	0	3	6	0	286	10.8763
27	80	52	0	5	1	0	79	2	0.5	1	1	55	2	1	4	0	50	286	10.8763
28	1	104	0	0	1	4	48	4	1	0	1	35	2	1	1	0	0	286	10.8763
30	51	12	0	8	1	3	71	2	0.5	1	1	65	2	1	10	0	50	286	10.8763
31	25	12	200	60	0	0	69	2	1	0	1	49	2	0	4	4	21	286	10.8763
32	16	12	10	14	1	3	82	2	0.1		1	40	1	0	6	0	0	342	5.81986
35	1	52	0	0	0	4	74	2	0.5	1	0	54	2	1	1		1	342	5.81986
37	4	24	0	0	0	0	74	2	0.7	1	0	54	2	1	4	0	0	1182	4.77249
43	4	0	0	0	0	6	56	4	3	0	0	39	2	1	4	0	0	3497	4.77249
46	24	52	50	20	1	16	44	6	0.1	1	0	25	2	1	8	0	16	3497	7.30328
47	3	52	50	0	0	0	52	3	3	0	0	20	2	1	2	0	1	3497	7.30328
48	2	0	0	2	0	6	69	4	0.5	1	0	30	2	1	2	0	10	3497	7.30328
50	50	0	50	25	1	6	68	3		0	0	50	2	0	4	0	40	3497	4.6829
52	30	0	500	10	1	6	61	2	0.1	1	0	9	2	0	5	0	15	3497	5.6829
53	20	12	50	5	1	9	61	3	0.1	1	0	25	2	1	4	0	16	3497	7.30328
54	16	52	5	12	1	6	69	3	0.1	1	1	59	2	1	3	0	12.5	3497	7.30328
55	16	40	50	3	1	6	77	2	0.5	1	1	35	2	1	8	0	8	3497	7.30328
58	25	11	0	15	0	6	47	5	7	0	1	17	2	1	10	0	15	3497	7.30328
59	15	0	0	0	0			2	0.3	1	1	10	2	0	1		7	3497	6.6829
60	28	52	50	4	1	2	60	2	0.1	1	0	42	2	0	4	0	20	3497	7.6829
61	46	0	100	50	1	6	54	6		1	1	24	2	0	8	0	28	3497	8.6829
68	6	52	10	0	0	5	57	6		1	1		2	1	2	0	4	237	14.0454
69	4	52	5	4	1	0	72	3	0.1	1	1	52	2	1	2	0	4	237	14.0454
70	2	104	0	2	0	0	58	5	0.1	1	1	43	2	1	2	0	4	237	14.0454
71	20	52	60	7	1	0	68	2	0.1	1	0	47	2	1	8	4	8	237	14.0454
72	3	52	0	2	0	0	51	4	0.5	1	1	5	2	1	2	0	1	237	14.0454
74	18	0	40	20	1	4	46	3	8	0	1	29	1	0	2	0	15	237	8.70431
75	30	312	40	0	1	0	25	3	0.01	1	1		2	0	4	0	10	237	8.70431
76	81	104	100	2	1	6	40	7	0.1	1	1	27	2	0	5	0	75	237	8.70431
77	2	104	100	3	0	9	36	6	2	0	1	13	1	1	2	0	1	237	8.70431
78	3	52	10	0	1	3	64	4	1	0	1		2	0	2	0	4	237	8.70431
79	18	780	0	0	0	6	38	8	0.01	1	1		2	1	0.5	0	17.5	237	8.70431
81	250	52	0	30	1	6	55	3	0.1	1	1	30	2	0	15	0	220	237	8.70431
82	2	52	60	30	1	0	65	2	1	0	0		2	1	2	0	10	237	8.70431
83	20	52	200	12	1	2	40	6	1	0	1	26	2	1	4	0	16	237	8.70431
86	4	52	0	0	0	0	82	9	0.1	1	1	72	2	1	4	0	0	1182	4.77249
87	1	24	0	0	0	6	61	2	0.8	1	1		2	1	1	0	1	1182	4.77249
90	7	52	0	6	1	12	40	5	0.1	1	1	25	2	0	3.5	0	0	1182	4.77249
91	10	104	100	0	1	0	83	4	0.01	1	1	68	2	0	2	0	4	1182	4.77249
92	16	104	100	20	0	6	72	12	0.5	1	1	40	1	0	4		4	3530	7.2899
94	25	52	50	12	1	3	62	5	0.01	1	1	47	2	0	3	0	0	3530	7.2899
95	3	156	0	4	0	6	63	5	0.3	1	1	35	2	1	3	0	3	3530	7.2899
96	3	12	6	0	0	6	52	5	0.1	1	1	20	2	1	3	0	3	3530	7.2899
97	4	312	20	0	0	6	52	5	0.01	1	1	37	2	1	2	0	2	3530	7.2899
98	1	52	0	0	1	3	52	3	0.01	1	1	2	2	1	1	0	0	3530	7.2899
99	2	12	0	0	0	6	63	10	0.1	1	1	28	2	1	2	0	2	3530	7.2899
100	200	52	500	12	1	9	38	4	0.05	1	0	23	2	0	5		135	158	4.96643
101	22	0	100	50	1	6	50	5	1	0	1	35	2	0	10	0	1	3497	8.6829
102	3	20	10	0	0	3	53	8	0.1	1	0	38	2	1	2	0	2	1061	7.45217
103	5	104	50	4	0	6	45	4	0.1	1	1	30	2	0	3		0	1061	7.45217
104	1	52	40	0	0	5	44	3	0.1	1	1	15	2	1	1	0	0	1061	7.45217
105	25	104	100	25	1	6	63	2		1	1	48	2	0	5		10	1061	7.45217
106	2	52	20	0	0	0	64	4	1	0	0	49	2	1	2	0	2	1061	7.45217
107	3	208	200	0	1	3	59	5	0.1	1	0	44	2	1	2	0	1	1061	7.45217
108	14	52	35	0	1	6	51	2	0.5	1	1	35	2	0	5.5	2	0	1061	7.45217
109	1	52	0	0	0	2	32	4	0.1	1	1	7	2	1	1	0	1	1061	7.45217
111	1	12	0	0	0	9	42	5	0.1	1	0		1	1	1	0	1	1061	7.45217
112	3	104	0	0	0	0	88	2	0.5	1	0	44	2	1	3	0	0	1061	7.45217
114	1	24	5	0	0	3	74	2	1	1	1	45	2	1	1	0	0	1061	7.45217
115	4	6	0	0	0	9	32	4	0.1	1	0	17	2	1	4	0	0	1061	7.45217
116	1	0	0	0	0	6	50	2	0.2	1	0	10	2	0	0.5	0	0	1061	7.45217
117	4	0	100	0	0	9	28	5	0.2	1	1	13	2	0	1	0	0	129	12.4515
118	100	52	10	35	0	2	64	2	0.5	1	1	57	2	1	2	0	100	1880	5.48498
119	3	0	50	0	0	6	43	5	0.05	1	1	3	2	1	3	0	0	1880	5.48498
120	1	156	0	0	0	0	60	2	0.1	1	1	45	2	1	1	0	0	1880	5.48498
126	1	78	0	0	0	6	50	6	0.5	1	0	20	2	1	1	0	0	1880	5.48498
127	15	52	50	50	0	9	32	7	0.1	1	1	15	2	0	2	0	8	1880	5.48498
128	4	52	30	0	0	0	70	2	1	0	1	60	2	1	4	0	0	1880	5.48498
129	1	52	0	0	0	0	63	5	0.1	1	1	48	2	0	1	0	0	1880	5.48498
131	12	52	0	0	1		90	5	0.5	1	1	43	2	0	1	0	5	1880	5.48498
132	3	52	0	0	0		74	2	0.3	1	0	35	2	1	3	0	0	1880	5.48498
133	2	52	0	3	1		70	10	0.1	1	1	55	1	1	2	0	0	1880	5.48498
138	1	52	20	0	0	2	62	3	0.1	1	0	44	2	1	1	0	0.5	1032	5.91563
139	3	104	50	0	0	0	30	5	0.5	1	0	4	1	1	2	0	0	1032	5.91563
143	4	52	40	10	1	6	55	4	0.1	1	0	30	2	0	2	2	1	1032	5.91563
144	2	104	400	0	1	5	67	3	0.1	1	0	52	2	1	2	0	0	1032	5.91563
147	14	78	10	11	1	6	55	3	0.5	1	1	40	2	0	4.5	0	8	1032	5.91563
152	50	0	300	30	1	9	34	12	0.1	1	1	20	2	0	5	0	25	1538	6.57179
154	8	0	250	10	1	16	55	2	0.1	1	0	29	2	1	4	0	4	1538	6.57179
155	4	0	30	15	0	9	35	6	0.5	1	1	20	2	0	1	0	2	1538	6.57179
156	3	156	50	8	1	0	73	3	0	1	0	55	2	1	3	0	0	237	14.0454
157	5	52		0		2	62	2			0	42		1	1	0	1	116	6.57179
158	13	12	200	35	1	5	50	5	0.1	1	1	35	2	0	1	8	4	116	6.86138
160	3	52	100	0	1	5	57	6			0	40	1	1	2	0	1	116	6.57179
161	0.25	0	40	0	0	4	70	2	1	0	0	55	2	1	0.25	0	1	116	6.57179
162	0.25	12	20	0	0	2	68	6	0.1	0	0	50	1	1	0.25	0	0	116	6.57179
163	7.5	52	100	30	1	0	76	2	3	0	1	63	2	0	1	0	1	116	6.86138
164	20	26	200	3	1	3	59	3	1	0	1	44	2	1	10	10	10	116	6.57179
165	4.5	208	100	0	1	0	61	6	1	0	0	50	2	0	1	0	1	116	6.86138
171	11	0	15	14	1	6	73	3	2	0	0	47	2	1	6	0	5	3102	4.80174
175	3	12	0	0	0	0	64	2	0.2	1	0	52	1	0	2	0	2	3102	4.80174
176	5	0	0	18	0	4	66	2	1	0	0	46	2	1	5	0	0	3102	4.80174
177	2.5	26		0	1	9	36	6	0.1	1	0		2	1	1.5	0	1	3102	4.80174
181	12	104	3	0	1	0	69	4	0.2	1	0	42	2	1	6	0	12	301	12.2485
182	7.5	104	100	15	1	6	42	5	0.1	1	1	22	2	0	5	0	1.5	301	12.2485
183	1	104	0	0	0	6	37	5	0.8	0	0	4	2	1	1		5	301	12.2485
185	21	52	0	7	1	2	46	5	0.1	1	0	26	2	1	1	0	1	301	12.2485
187	4.5	104	10	0	1	2	56	4	0.1	1	0	37	2	1	2	2	0	301	12.2485
188	12.5	0	6	0	1	3	85	1	0.1	1	0	70	2	0	5.5	0	3	3102	4.80174
190	11	0	0	0	1	3	72	4	0.1	1	0	58	2	0	0.5	0	1	3102	4.80174
193	2	52		0	0	1	51	2	1	0	0	38	2	1	0	0	0	3102	4.80174
195	2	26	10	0	0	6	79	5	1	0	0	70	2	0	1	0	0	3102	4.80174
196	10	52	20	20	1	0	81	3	0.03	1	0	65	2	0	10	10	10	669	8.23995
197	7	12	30	15	1	6	34	3	0.1	1	0	26	2	0	2	0	2	669	8.23995
202	4	52	10	8	1	3	68	2	0.1	1	0	53	2	1	2	0	2	669	8.23995
203	2	52	0	0	0	1	77	2	0.1	1	0	57	2	1	2	0	0	669	8.23995
205	4.25	52	40	0	1	6	44	4	0.1	1	0	34	2	0	0.25		1	669	8.23995
206	4	0		0	0	6	61	4	4	0	0	40	2	1	0.5	0	3.5	446	4.55029
207	12.5	30	150	0	0	5	70	2	0.1	1	0	50	2	0	3.5	9	3.5	446	4.55029
208	4	52	0	0	0	6	57	5	0.1	1	0	47	2	1	4	0	4	565	6.45516
209	2	52	40	0	0	0	76	4	0.1	1	0	62	2	1	2	0	0	565	6.45516
210	15	12	40	0	1	3	77	3	0.1	1	1	62	1	0	4	7	4	565	6.45516
212	19	52	30	1	1	2	68	6	5	0	1	38	1	0	6	4	9	565	6.45516
213	60	0	20	100	1		69	4	2	0	1		2	0	10	45	10	565	6.45516
216	10	0	50	20	1	3	76	3	0.1	1	0	60	1	0	0.5	0	7	3102	4.80174
221	70	52	200	15	1	3	64	4	0.1	1	1	50	2	0	5	30	30	234	6.02213
222	40	26	50	30	0	6	33	4	0.1	1	1	20	2	0	2	10	30	234	6.02213
223	56	52	300	0	1	3	55	9	0.5	1	1	33	2	1	6	0	50	234	6.02213
225	117	52	100	30	1	6	49	5	1	0	1	29	2	0	7	7	97	234	6.02213
226	2	24	0	0	0	3	88	3	0.1	1	0	73	2	1	2	0	0	234	6.02213
227	1	52	0	0	0	3	51	3	0.1	1	0	40	2	1	1	0	1	234	6.02213
230	31	52		50	1	6	67	3	0.1	1	1	43	2	0	2	0	9	541	9.24425
231	7.5	10	200	0	1	6	66	7	0.3	1	1	51	2	1	4	0	3.5	541	9.24425
233	4	52	100	0	0	0	73	3	3	0	0	20	2	1	1	0	3.5	541	9.24425
234	4	52		0	1	3	68	4	1	0	0	53	2	0	4	0	0	541	9.24425
235	11	5	100	0		3	45	1	0.1	1	0	3	2	0	8	0	0	541	9.24425
236	0.5	52	0	0	0	0	37	7	0.4	1	0	20	2	1	0	0	0	541	9.24425
237	0.5	52	0	0	0	0	70	7	0.4	1	0	58	2	1	1	0	1	541	9.24425
239	2	52	0	0	0	1	50	8	1	0	1	29	2	1	2	0	2	541	9.24425
241	6	52	0	5	0	2	62	3	0.15	1	0	17	2	0	3	0	2	541	9.24425
245	8	26	100	0	1	0	61	3	0.1	1	0	47	1	1	1	0	0	175	8.99395
247	0.25	52	0	0	0	1	62	2	0.2	1	0	2	2	1	1	0	1	175	8.99395
250	1	104	30	0	0	3	60	3	0.5	1	0	45	2	1	1	0	1	158	4.96643
251	10.5	52	50	0	1	0	68	2	0.5	1	0	52	1	0	6	3	2.5	3102	4.80174
253	30	1	100	23		6	42	1	3	0	0	28	1	0	6	11	8	3102	4.80174
254	4	52	300	2		7	67	2	0.1	1	0	50	2	1	4	0	0	3102	4.80174
264	5.5	0	20	0	0	9	62	5	0.5	1	1	25	2	0	3		5.5	885	6.08179
265	30.5	0	250	35	1	6	58	3	0.1	1	0	45	2	0	3	0	25	626	8.6751
269	11	12		30	1	6	50	2	0.1	1	1	15	1	0	2	0	0	626	8.6751
272	6.5	24	50	15	1	1	71	4	0.1	1	1	57	2	0	1.5	0	1.5	644	14.5072
274	4	52	20	0	1	0	30	7	0.1	1	0	20	2	1	4	0	1	644	14.5072
278	25	12	30	8	0	6	43	3	3	0	0	28	2	0	1.5	0	5	161	14.0322
279	40	52	50	20	1	0	63	5	0.1	1	1	53	2	0	3	5	40	161	14.0322
280	30	104	40	3	1	1	65	5	2	0	0	32	2	1	24	0	6	161	14.0322
281	50	52	25	25	1	9	47	5	2	0	1	22	2	0	5	0	10	161	14.0322
282	14	52	10	8	0	3	50	6	2	0	0	38	2	1	8	0	6	161	14.0322
283	80	52		20	1	0	70	5	0.1	1	0	60	2	1	5	12	60	161	14.0322
285	1	78	0	0	0	3	33	7	0.1	1	0	25	2	1	1	0	1	862	6.43585
289	8	104	30	50	0	6	37	5	0.1	1	1	27	2	0	8	0	0	187	6.16277
290	8.5	12	30	28	1	6	59	5	0.1	1	1	39	2	0	3	3	0	187	6.16277
292	8	12	5	2	1	1	75	1	0.1	1	0	63	2	1	6	0	2	187	6.16277
296	5.5	12	70	0		1	75	3	0.1	1	0	65	2	1	5.5	0	0	1414	4.72349
298	2	0	0	0		0	75	2	0.1	1	0	38	2	1	2	0	0	1414	4.72349
299	10	312	70	4		0	42	5	0.1	1	0	30	2	1	6	0	6	1414	4.72349
300	2	12	0	0	0	0	81	4	0.1	1	0	70	2	1	1	0	0	1414	4.72349
